# Supplementary material for: joineRML: a joint model and software package for time-to-event and multivariate longitudinal outcomes
Source: Springer Nature journal article supplement (doi:10.1186/s12874-018-0502-1), 2018-06-07
Supplement: MOESM1 [file 15828476]

# Appendix for “`joineRML`: A joint model and software package for time-to-event and multivariate longitudinal outcomes”

G. L. Hickey<sup>1</sup> & P. Philipson<sup>2</sup>, A. L. Jorgensen<sup>1</sup>, R. Kolamunnage-Dona<sup>1</sup>

<sup>1</sup>*Department of Biostatistics, Institute of Translational Medicine, University of Liverpool*

<sup>2</sup>*Department of Mathematics, Physics and Electrical Engineering, Northumbria University*

July 31, 2017

## 1 Likelihood

The *observed* data likelihood is given by

$$\prod_{i=1}^n \left( \int_{-\infty}^{\infty} f(\mathbf{y}_i | \mathbf{b}_i, \boldsymbol{\theta}) f(T_i, \delta_i | \mathbf{b}_i, \boldsymbol{\theta}) f(\mathbf{b}_i | \boldsymbol{\theta}) d\mathbf{b}_i \right), \quad (1)$$

where  $\boldsymbol{\theta} = (\boldsymbol{\beta}^\top, \text{vech}(\mathbf{D}), \sigma_1^2, \dots, \sigma_K^2, \lambda_0(t), \boldsymbol{\gamma}_v^\top, \boldsymbol{\gamma}_y^\top)$  is the collection of unknown parameters that we want to estimate, with  $\text{vech}(\mathbf{D})$  denoting the half-vectorisation operator that returns the vector of lower-triangular elements of matrix  $\mathbf{D}$ , and

$$\begin{aligned} f(\mathbf{y}_i | \mathbf{b}_i, \boldsymbol{\theta}) &= \left( \prod_{k=1}^K (2\pi)^{-\frac{n_{ik}}{2}} \right) |\boldsymbol{\Sigma}_i|^{-\frac{1}{2}} \exp \left\{ -\frac{1}{2} (\mathbf{y}_i - \mathbf{X}_i \boldsymbol{\beta} - \mathbf{Z}_i \mathbf{b}_i)^\top \boldsymbol{\Sigma}_i^{-1} (\mathbf{y}_i - \mathbf{X}_i \boldsymbol{\beta} - \mathbf{Z}_i \mathbf{b}_i) \right\}, \\ f(T_i, \delta_i | \mathbf{b}_i; \boldsymbol{\theta}) &= [\lambda_0(T_i) \exp \{ \mathbf{v}_i^\top \boldsymbol{\gamma}_v + W_{2i}(T_i, \mathbf{b}_i) \}]^{\delta_i} \exp \left\{ -\int_0^{T_i} \lambda_0(u) \exp \{ \mathbf{v}_i^\top \boldsymbol{\gamma}_v + W_{2i}(u, \mathbf{b}_i) \} du \right\}, \\ f(\mathbf{b}_i | \boldsymbol{\theta}) &= (2\pi)^{-\frac{r}{2}} |\mathbf{D}|^{-\frac{1}{2}} \exp \left\{ -\frac{1}{2} \mathbf{b}_i^\top \mathbf{D}^{-1} \mathbf{b}_i \right\}, \end{aligned}$$

where  $r = \sum_{k=1}^K r_k$  is the total dimensionality of the random effects variance-covariance matrix.

## 2 Score & update equations

From (1), the expected complete-data log-likelihood is given by

$$Q(\boldsymbol{\theta} | \hat{\boldsymbol{\theta}}^{(m)}) = \sum_{i=1}^n \int_{-\infty}^{\infty} \left\{ \log f(\mathbf{y}_i, T_i, \delta_i, \mathbf{b}_i | \boldsymbol{\theta}) \right\} f(\mathbf{b}_i | T_i, \delta_i, \mathbf{y}_i, \hat{\boldsymbol{\theta}}^{(m)}) d\mathbf{b}_i$$

where the expectation is taken over the conditional random effects distribution  $f(\mathbf{b}_i | T_i, \delta_i, \mathbf{y}_i, \hat{\boldsymbol{\theta}}^{(m)})$ . Hence, the updates require expectations about the random effects be calculated of the form  $\mathbb{E} [h(\mathbf{b}_i) | T_i, \delta_i, \mathbf{y}_i; \hat{\boldsymbol{\theta}}^{(m)}]$ , which, in the interests of brevity, we denote here onwards as  $\mathbb{E} [h(\mathbf{b}_i)]$  in the update estimators. This expectation is conditional on the observed data  $(T_i, \delta_i, \mathbf{y}_i)$  for each subject, the covariates (including measurement

times)  $(\mathbf{X}_i, \mathbf{Z}_i, \mathbf{v}_i)$ , which are implicitly dependent, and the current estimate of the model parameters  $\boldsymbol{\theta}$  from the  $m$ -th iteration.

We can decompose the complete-data log-likelihood for subject  $i$  into

$$\log f(\mathbf{y}_i, T_i, \delta_i, \mathbf{b}_i | \boldsymbol{\theta}) = \log f(\mathbf{y}_i | \mathbf{b}_i, \boldsymbol{\theta}) + \log f(T_i, \delta_i | \mathbf{b}_i, \boldsymbol{\theta}) + \log f(\mathbf{b}_i | \boldsymbol{\theta}),$$

where

$$\begin{aligned} \log f(\mathbf{y}_i | \mathbf{b}_i, \boldsymbol{\theta}) &= -\frac{1}{2} \left\{ \left( \sum_{k=1}^K n_{ik} \right) \log(2\pi) + \log |\boldsymbol{\Sigma}_i| + (\mathbf{y}_i - \mathbf{X}_i \boldsymbol{\beta} - \mathbf{Z}_i \mathbf{b}_i)^\top \boldsymbol{\Sigma}_i^{-1} (\mathbf{y}_i - \mathbf{X}_i \boldsymbol{\beta} - \mathbf{Z}_i \mathbf{b}_i) \right\} \quad (2) \\ \log f(T_i, \delta_i | \mathbf{b}_i, \boldsymbol{\theta}) &= \delta_i \log \lambda_0(T_i) + \delta_i [\mathbf{v}_i^\top \boldsymbol{\gamma}_v + W_{2i}(T_i, \mathbf{b}_i)] - \int_0^{T_i} \lambda_0(u) \exp \{ \mathbf{v}_i^\top \boldsymbol{\gamma}_v + W_{2i}(u, \mathbf{b}_i) \} du, \\ \log f(\mathbf{b}_i | \boldsymbol{\theta}) &= -\frac{1}{2} \{ r \log(2\pi) + \log |\mathbf{D}| + \mathbf{b}_i^\top \mathbf{D}^{-1} \mathbf{b}_i \}. \end{aligned}$$

The update equations are then calculated from solving the score equations,  $\partial Q(\boldsymbol{\theta} | \hat{\boldsymbol{\theta}}^{(m)}) / \partial \boldsymbol{\theta}$ , for  $\boldsymbol{\theta}$ . The components of the score vector are effectively given by Lin et al. [1]; however, there the random effects were hierarchically centred about the corresponding fixed effect terms as part of a current values parametrization, as well as being embedded in a frailty Cox model, which has consequences on the score here. The components of the score vector and corresponding M-step update equations for each parameter are given as follows.

## 2.1 $\lambda_0(t)$

The score with respect to  $\lambda_0(t)$  is calculated as

$$S(\lambda_0(t)) = \sum_{i=1}^n \left\{ \frac{\delta_i I(T_i = t)}{\lambda_0(t)} - \mathbb{E} [\exp \{ \mathbf{v}_i^\top \boldsymbol{\gamma}_v + W_{2i}(t, \mathbf{b}_i) \}] I(T_i \geq t) \right\},$$

which leads to the closed-form update:

$$\hat{\lambda}_0(t) = \frac{\sum_{i=1}^n \delta_i I(T_i = t)}{\sum_{i=1}^n \mathbb{E} [\exp \{ \mathbf{v}_i^\top \boldsymbol{\gamma}_v + W_{2i}(t, \mathbf{b}_i) \}] I(T_i \geq t)}, \quad (3)$$

which is only evaluated at distinct observed event times,  $t_j$  ( $j = 1, \dots, J$ ), where  $I(\mathcal{A})$  denotes an indicator function that takes the value 1 if event  $\mathcal{A}$  occurs, and zero otherwise.

## 2.2 $\boldsymbol{\beta}$

The score with respect to  $\boldsymbol{\beta}$  is calculated as

$$S(\boldsymbol{\beta}) = \sum_{i=1}^n \{ \mathbf{X}_i^\top \boldsymbol{\Sigma}_i^{-1} (\mathbf{y}_i - \mathbf{X}_i \boldsymbol{\beta} - \mathbf{Z}_i \mathbb{E}[\mathbf{b}_i]) \},$$

which leads to the closed-form update equation:

$$\begin{aligned}\hat{\boldsymbol{\beta}} &= \left( \sum_{i=1}^n \mathbf{X}_i^\top \boldsymbol{\Sigma}_i^{-1} \mathbf{X}_i \right)^{-1} \left( \sum_{i=1}^n \mathbf{X}_i^\top \boldsymbol{\Sigma}_i^{-1} (\mathbf{y}_i - \mathbf{Z}_i \mathbb{E}[\mathbf{b}_i]) \right), \\ &= \left( \sum_{i=1}^n \mathbf{X}_i^\top \mathbf{X}_i \right)^{-1} \left( \sum_{i=1}^n \mathbf{X}_i^\top (\mathbf{y}_i - \mathbf{Z}_i \mathbb{E}[\mathbf{b}_i]) \right).\end{aligned}$$

### 2.3 $\sigma_k^2$

Rewriting (2) as  $\sum_{k=1}^K \log\{f(\mathbf{y}_{ik} | \mathbf{b}_{ik}, \boldsymbol{\theta})\}$ , the score with respect to  $\sigma_k^2$  is calculated as

$$\begin{aligned}S(\sigma_k^2) &= -\frac{1}{2\sigma_k^2} \sum_{i=1}^n \left\{ n_{ik} - \frac{1}{\sigma_k^2} \mathbb{E} \left[ (\mathbf{y}_{ik} - \mathbf{X}_{ik} \boldsymbol{\beta}_k - \mathbf{Z}_{ik} \mathbf{b}_{ik})^\top (\mathbf{y}_{ik} - \mathbf{X}_{ik} \boldsymbol{\beta}_k - \mathbf{Z}_{ik} \mathbf{b}_{ik}) \right] \right\} \\ &= -\frac{1}{2\sigma_k^2} \sum_{i=1}^n \left\{ n_{ik} - \frac{1}{\sigma_k^2} \left[ (\mathbf{y}_{ik} - \mathbf{X}_{ik} \boldsymbol{\beta}_k)^\top (\mathbf{y}_{ik} - \mathbf{X}_{ik} \boldsymbol{\beta}_k - 2\mathbf{Z}_{ik} \mathbb{E}[\mathbf{b}_{ik}]) \right. \right. \\ &\quad \left. \left. + \text{trace}(\mathbf{Z}_{ik}^\top \mathbf{Z}_{ik} \mathbb{E}[\mathbf{b}_{ik} \mathbf{b}_{ik}^\top]) \right] \right\},\end{aligned}$$

which leads to the closed-form update equation:

$$\begin{aligned}\hat{\sigma}_k^2 &= \frac{1}{\sum_{i=1}^n n_{ik}} \sum_{i=1}^n \mathbb{E} \left\{ (\mathbf{y}_{ik} - \mathbf{X}_{ik} \boldsymbol{\beta}_k - \mathbf{Z}_{ik} \mathbf{b}_{ik})^\top (\mathbf{y}_{ik} - \mathbf{X}_{ik} \boldsymbol{\beta}_k - \mathbf{Z}_{ik} \mathbf{b}_{ik}) \right\} \\ &= \frac{1}{\sum_{i=1}^n n_{ik}} \sum_{i=1}^n \left\{ (\mathbf{y}_{ik} - \mathbf{X}_{ik} \boldsymbol{\beta}_k)^\top (\mathbf{y}_{ik} - \mathbf{X}_{ik} \boldsymbol{\beta}_k - 2\mathbf{Z}_{ik} \mathbb{E}[\mathbf{b}_{ik}]) + \text{trace}(\mathbf{Z}_{ik}^\top \mathbf{Z}_{ik} \mathbb{E}[\mathbf{b}_{ik} \mathbf{b}_{ik}^\top]) \right\}.\end{aligned}$$

### 2.4 $\mathbf{D}$

Using the transformation  $\mathbf{V} = \mathbf{D}^{-1}$ , the score with respect to  $\mathbf{V}$  is calculated as

$$S(\mathbf{V}) = \frac{n}{2} \left\{ 2\mathbf{V}^{-1} - \text{diag}(\mathbf{V}^{-1}) \right\} - \frac{1}{2} \left[ 2 \sum_{i=1}^n \mathbb{E}[\mathbf{b}_i \mathbf{b}_i^\top] - \text{diag} \left( \sum_{i=1}^n \mathbb{E}[\mathbf{b}_i \mathbf{b}_i^\top] \right) \right],$$

which leads to the closed-form update equation for  $\mathbf{D}$ :

$$\hat{\mathbf{D}} = \frac{1}{n} \sum_{i=1}^n \mathbb{E}[\mathbf{b}_i \mathbf{b}_i^\top].$$

We also require the score for  $\boldsymbol{\theta}_b \equiv \text{vech}(\mathbf{D})$ , which can be calculated as

$$S(\boldsymbol{\theta}_b) = -\frac{n}{2} \text{trace} \left( \mathbf{D}^{-1} \frac{\partial \mathbf{D}}{\partial \boldsymbol{\theta}_b} \right) + \frac{1}{2} \sum_{i=1}^n \left\{ \text{trace} \left( \mathbf{D}^{-1} \frac{\partial \mathbf{D}}{\partial \boldsymbol{\theta}_b} \mathbf{D}^{-1} \mathbb{E}(\mathbf{b}_i \mathbf{b}_i^\top) \right) \right\}$$

### 2.5 $\boldsymbol{\gamma}$

The scores with respect to  $\boldsymbol{\gamma}_v$  and  $\boldsymbol{\gamma}_y$  do not have closed-form solutions. Therefore, they are updated jointly using a one-step Newton-Raphson algorithm iteration. We can write the scores with respect to  $\boldsymbol{\gamma} = (\boldsymbol{\gamma}_v^\top, \boldsymbol{\gamma}_y^\top)^\top$

as

$$\begin{aligned} S(\boldsymbol{\gamma}) &= \sum_{i=1}^n \left[ \delta_i \mathbb{E} [\tilde{\mathbf{v}}_i(T_i)] - \int_0^{T_i} \lambda_0(u) \mathbb{E} [\tilde{\mathbf{v}}_i(u) \exp\{\tilde{\mathbf{v}}_i^\top(u) \boldsymbol{\gamma}\}] du \right] \\ &= \sum_{i=1}^n \left[ \delta_i \mathbb{E} [\tilde{\mathbf{v}}_i(T_i)] - \sum_{j=1}^J \lambda_0(t_j) \mathbb{E} [\tilde{\mathbf{v}}_i(t_j) \exp\{\tilde{\mathbf{v}}_i^\top(t_j) \boldsymbol{\gamma}\}] I(T_i \geq t_j) \right], \end{aligned}$$

where  $\tilde{\mathbf{v}}_i(t) = (\mathbf{v}_i^\top, \mathbf{z}_{i1}^\top(t) \mathbf{b}_{i1}, \dots, \mathbf{z}_{iK}^\top(t) \mathbf{b}_{iK})$  is a  $(q+K)$ -vector, and the integration over the survival process has been replaced with a finite summation over the process evaluated at the unique failure times, since the non-parametric estimator of baseline hazard is zero except at observed failure times [2]. As  $\lambda_0(t_j)$  is a function of  $\boldsymbol{\gamma}$ , this is not a closed-form solution. Substituting  $\lambda_0(t)$  by  $\hat{\lambda}_0(t)$  from (3), which is a function of  $\boldsymbol{\gamma}$  and the observed data itself, gives a score that is independent of  $\lambda_0(t)$ . Discussion of this in the context of univariate joint modelling is given by Hsieh et al. [3]. A useful result is that the maximum profile likelihood estimator is the same as the maximum partial likelihood estimator [4], meaning that plugging-in the estimator  $\hat{\lambda}_0(t)$  into (1) gives a profile likelihood independent of  $\lambda_0(t)$ .

The information for  $\boldsymbol{\gamma}$  is calculated by taking the partial derivative of the score above, and is given by

$$I(\boldsymbol{\gamma}) \equiv -\frac{\partial}{\partial \boldsymbol{\gamma}} S(\boldsymbol{\gamma}) = \sum_{i=1}^n \sum_{j=1}^J \left\{ \hat{\lambda}_0(t_j) I(T_i \geq t_j) \mathbb{E} [\tilde{\mathbf{v}}_i^{\otimes 2}(t_j) \exp\{\tilde{\mathbf{v}}_i^\top(t_j) \boldsymbol{\gamma}\}] \right\} - \sum_{j=1}^J \frac{\hat{\lambda}_0(t_j)^2 \boldsymbol{\Gamma}(t_j)}{\sum_{i=1}^n \delta_i I(T_i = t_j)}.$$

where

$$\boldsymbol{\Gamma}(t_j) = \left\{ \sum_{i=1}^n \mathbb{E} [\tilde{\mathbf{v}}_i(t_j) \exp\{\tilde{\mathbf{v}}_i^\top(t_j) \boldsymbol{\gamma}\}] I(T_i \geq t_j) \right\}^{\otimes 2},$$

$\hat{\lambda}_0(t)$  is given by (3), which is also a function of  $\boldsymbol{\gamma}$ , and  $\mathbf{a}^{\otimes 2} = \mathbf{a} \mathbf{a}^\top$  is the outer-product of the vector  $\mathbf{a}$ . In practice, calculation of  $I(\boldsymbol{\gamma})$  is computationally expensive to evaluate. Therefore, in some situations we may want to approximate it. One approximation we consider is a Gauss-Newton-like approximation [5, p. 8], which exploits the empirical information matrix approach calculation, but restricted to  $\boldsymbol{\gamma}$  only. To further compensate for this approximation, we also use a nominal step-size of 0.5 rather than 1, which is used when exactly calculating  $I(\boldsymbol{\gamma})$ . Hence, the one-step block update at the  $(m+1)$ -th EM algorithm iteration is

$$\hat{\boldsymbol{\gamma}}^{(m+1)} = \hat{\boldsymbol{\gamma}}^{(m)} + I(\hat{\boldsymbol{\gamma}}^{(m)})^{-1} S(\hat{\boldsymbol{\gamma}}^{(m)}).$$

## References

- [1] H Lin, C. E. McCulloch, and S. T. Mayne. “Maximum likelihood estimation in the joint analysis of time-to-event and multiple longitudinal variables”. In: *Statistics in Medicine* 21 (2002), pp. 2369–2382.
- [2] R Henderson, P. J. Diggle, and A Dobson. “Joint modelling of longitudinal measurements and event time data”. In: *Biostatistics* 1.4 (2000), pp. 465–480.
- [3] F Hsieh, Y. K. Tseng, and J. L. Wang. “Joint modeling of survival and longitudinal data: Likelihood approach revisited”. In: *Biometrics* 62.4 (2006), pp. 1037–1043.
- [4] H Lin. “A finite mixture model for joint longitudinal biomarker and survival outcome responses”. Ph.D. Cornell University, 2000.
- [5] G. J. McLachlan and T Krishnan. *The EM Algorithm and Extensions*. Second. Wiley-Interscience, 2008.
